# Supplementary material for: A Ratiometric Organic Fluorescent Nanogel Thermometer for Highly Sensitive Temperature Sensing
Source: MDPI journal article supplement (doi:10.3390/bios12090702), 2022-09-01
Supplement: s1 [file s1]

## Supplementary Materials

### **A Ratiometric Organic Fluorescent Nanogel Thermometer for Highly Sensitive Temperature Sensing**

**Chao Wang<sup>†</sup>, Xianhao Zhao<sup>†</sup>, Kaiyu Wu, Shuyi Lv and Chunlei Zhu\***

Key Laboratory of Functional Polymer Materials of Ministry of Education, State Key Laboratory of Medicinal Chemical Biology, Institute of Polymer Chemistry, College of Chemistry, Nankai University, Tianjin 300071, China

\*Correspondence: [chunlei.zhu@nankai.edu.cn](mailto:chunlei.zhu@nankai.edu.cn)

<sup>†</sup>These authors contributed equally to this work.

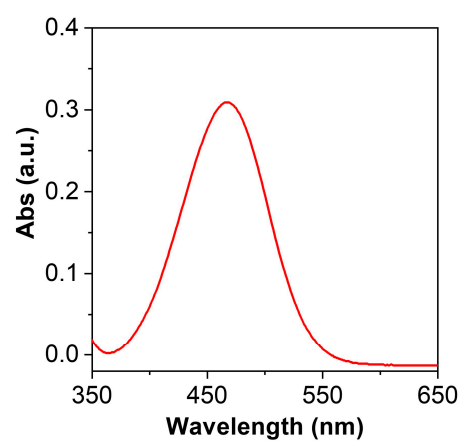

**Figure S1.** Absorption spectrum of TVPA in DMSO. [TVPA] = 10  $\mu$ M.

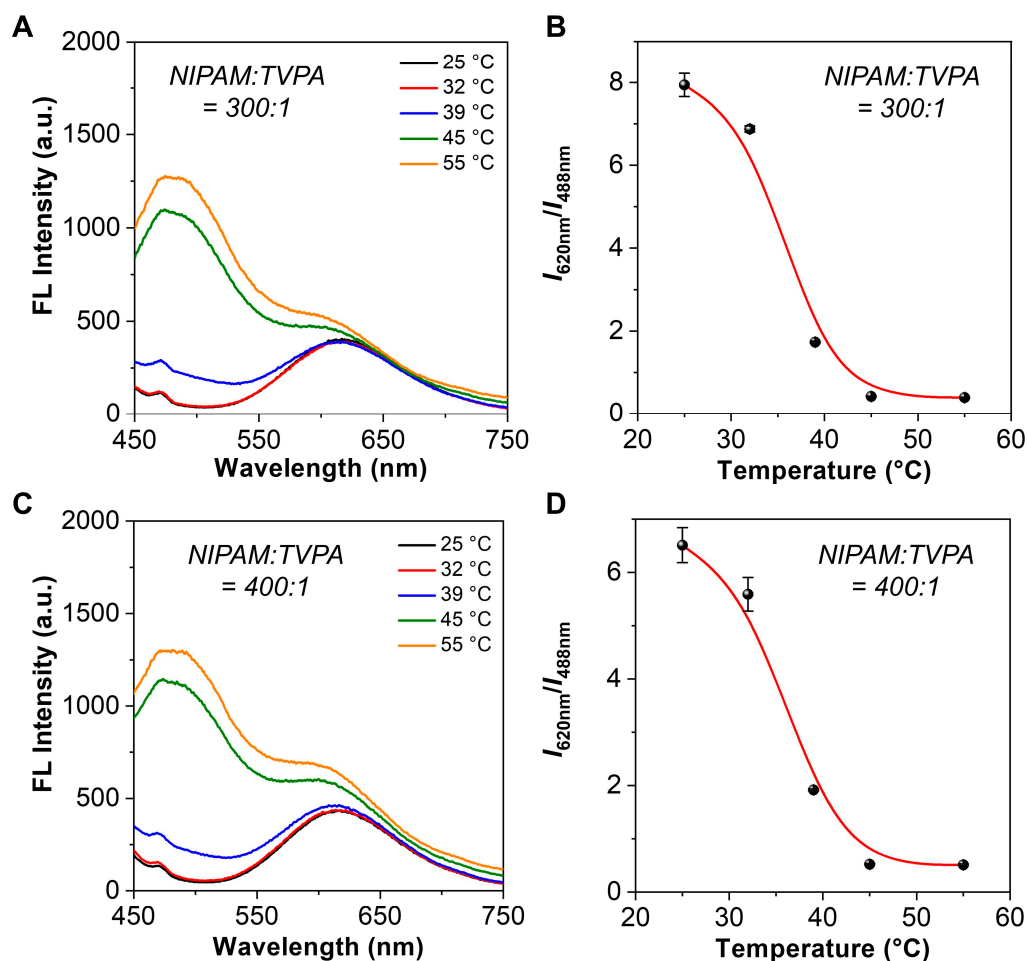

**Figure S2.** Fabrication of nanogels ( $0.25 \text{ mg mL}^{-1}$ ) with different molar ratios of NIPAM and TVPA. (A) Temperature-dependent emission spectra of the nanogel (NIPAM:TVPA = 300:1).  $\text{Ex} = 405 \text{ nm}$ . (B) Changes in the ratio of the emission intensities at 620 and 488 nm from panel (A) as a function of temperature ( $n = 3$ ). (C) Temperature-dependent emission spectra of the nanogel (NIPAM:TVPA = 400:1). (D) Changes in the ratio of the emission intensities at 620 and 488 nm from panel (C) as a function of temperature ( $n = 3$ ).  $\text{Ex} = 405 \text{ nm}$ .

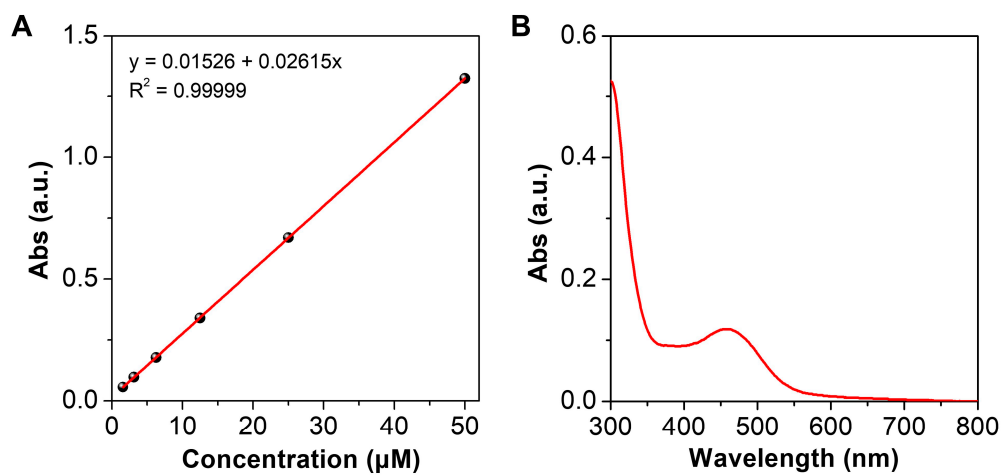

**Figure S3.** Quantification of TVPA in the nanogel (NIPAM:TVPA = 200:1). **(A)** Calibration curve of TVPA in water. **(B)** Absorption spectrum of NG-1 ( $2 \text{ mg mL}^{-1}$ ) in water.

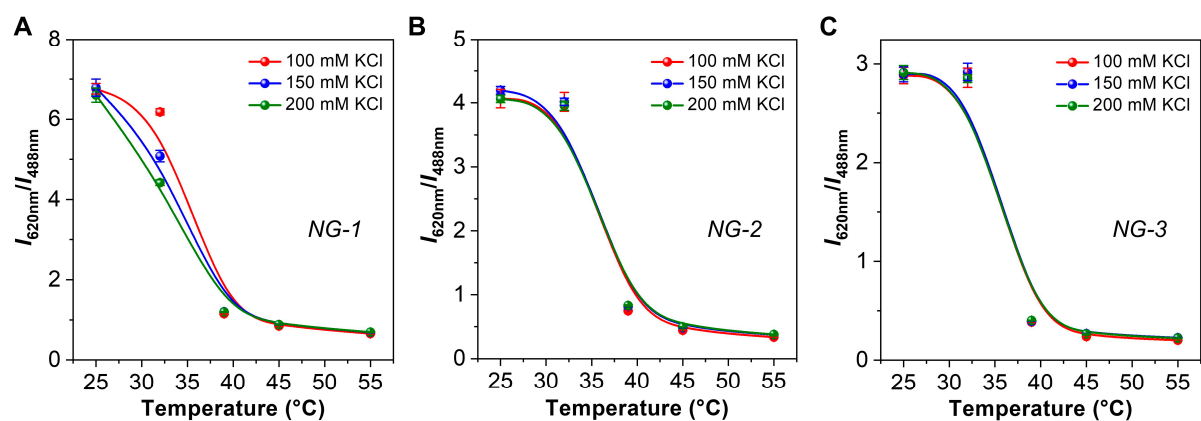

**Figure S4.** Changes in the ratio of the emission intensity at 620 and 488 nm as a function of temperature at different concentrations of KCl solutions ( $n = 3$ ). (A) NG-1. (B) NG-2. (C) NG-3.

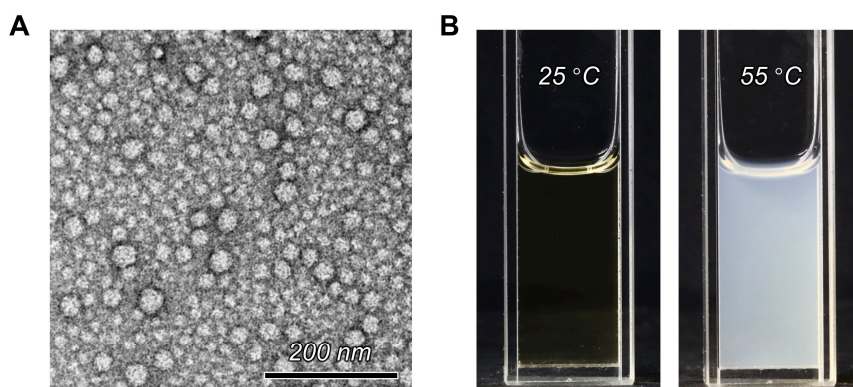

**Figure S5.** Characterizations of the physical properties of NG-3. (A) TEM image of NG-3. (B) Photographs of NG-3 ( $2 \text{ mg mL}^{-1}$ ) in water at 25 and 55 °C, respectively.

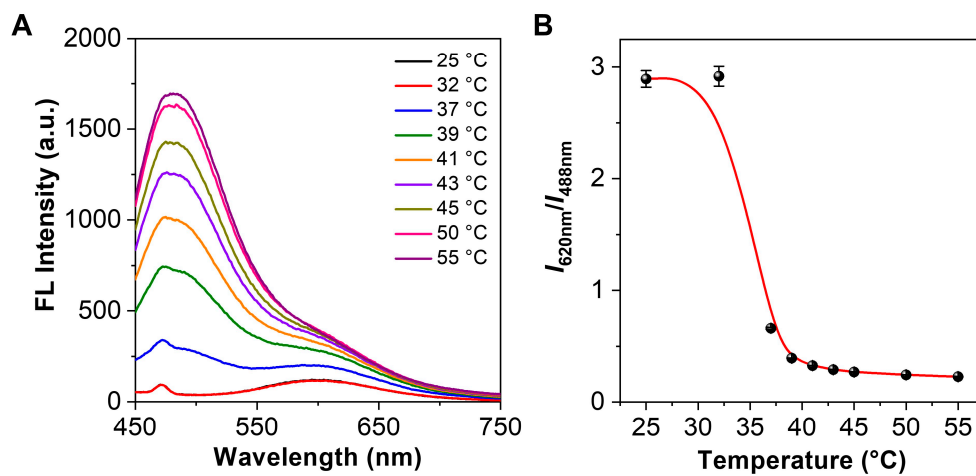

**Figure S6.** Changes in the fluorescence signals of NG-3 (0.25 mg mL<sup>-1</sup>) in 150 mM KCl solution. (A) Emission spectra of NG-3 at different temperatures in the presence of 150 mM KCl solution. Ex = 405 nm. (B) Changes in the ratio of the emission intensity at 620 and 488 nm from panel (A) as a function of temperature ( $n = 3$ ).

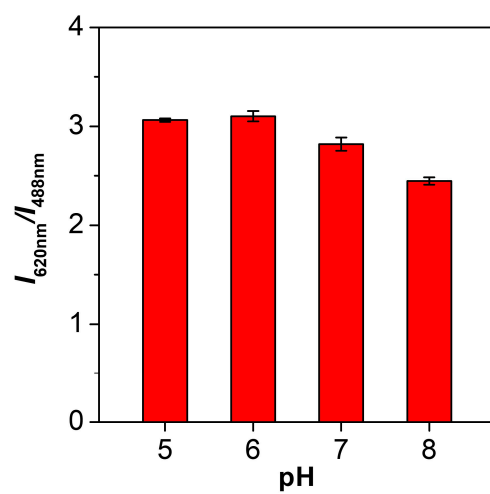

**Figure S7.** Impact of pH values on the ratio of the emission intensities of NG-3 at 620 and 488 nm.



**Table S1.** Thermometric performance of nanogels with different molar ratios of NIPAM and TVPA at different temperatures.

| $T$ (°C) | 100:1                          |                    | 200:1                          |                    | 300:1                          |                    | 400:1                          |                    |
|----------|--------------------------------|--------------------|--------------------------------|--------------------|--------------------------------|--------------------|--------------------------------|--------------------|
|          | $S_r$<br>(% °C <sup>-1</sup> ) | $\delta T$<br>(°C) |
| 32       | 2.25                           | 1.69               | 2.74                           | 0.61               | 2.22                           | 0.40               | 2.36                           | 2.05               |
| 39       | 7.27                           | 0.37               | 63.60                          | 0.02               | 42.41                          | 0.02               | 27.36                          | 0.01               |
| 45       | 69.80                          | 0.02               | 50.60                          | 0.05               | 51.74                          | 0.04               | 44.56                          | 0.05               |
| 55       | 9.34                           | 0.10               | 0.24                           | 14.23              | 0.70                           | 10.85              | 0.21                           | 14.44              |

**Table S2.** Thermometric performance of NG-1 at different temperatures.

| <i>T</i> (°C) | 100 mM KCl                                    |                    | 150 mM KCl                                    |                    | 200 mM KCl                                    |                    |
|---------------|-----------------------------------------------|--------------------|-----------------------------------------------|--------------------|-----------------------------------------------|--------------------|
|               | <i>S<sub>r</sub></i><br>(% °C <sup>-1</sup> ) | $\delta T$<br>(°C) | <i>S<sub>r</sub></i><br>(% °C <sup>-1</sup> ) | $\delta T$<br>(°C) | <i>S<sub>r</sub></i><br>(% °C <sup>-1</sup> ) | $\delta T$<br>(°C) |
| 32            | 0.81                                          | 0.44               | 4.43                                          | 1.04               | 18.39                                         | 0.95               |
| 39            | 61.98                                         | 0.02               | 45.91                                         | 0.01               | 16.54                                         | 0.02               |
| 45            | 6.16                                          | 0.03               | 5.96                                          | 0.03               | 4.66                                          | 0.03               |
| 55            | 2.75                                          | 8.27               | 2.68                                          | 9.43               | 2.50                                          | 8.83               |

**Table S3.** Thermometric performance of NG-2 at different temperatures.

| $T$ (°C) | 100 mM KCl                     |                    | 150 mM KCl                     |                    | 200 mM KCl                     |                    |
|----------|--------------------------------|--------------------|--------------------------------|--------------------|--------------------------------|--------------------|
|          | $S_r$<br>(% °C <sup>-1</sup> ) | $\delta T$<br>(°C) | $S_r$<br>(% °C <sup>-1</sup> ) | $\delta T$<br>(°C) | $S_r$<br>(% °C <sup>-1</sup> ) | $\delta T$<br>(°C) |
| 32       | 0.21                           | 1.34               | 0.65                           | 0.52               | 0.39                           | 0.65               |
| 39       | 62.40                          | 0.01               | 56.06                          | 0.01               | 53.62                          | 0.02               |
| 45       | 11.43                          | 0.01               | 11.42                          | 0.01               | 11.19                          | 0.01               |
| 55       | 3.18                           | 2.04               | 2.96                           | 2.59               | 3.13                           | 8.02               |

**Table S4.** Thermometric performance of NG-3 at different temperatures.

| <i>T</i> (°C) | 100 mM KCl                                    |                    | 150 mM KCl                                    |                    | 200 mM KCl                                    |                    |
|---------------|-----------------------------------------------|--------------------|-----------------------------------------------|--------------------|-----------------------------------------------|--------------------|
|               | <i>S<sub>r</sub></i><br>(% °C <sup>-1</sup> ) | $\delta T$<br>(°C) | <i>S<sub>r</sub></i><br>(% °C <sup>-1</sup> ) | $\delta T$<br>(°C) | <i>S<sub>r</sub></i><br>(% °C <sup>-1</sup> ) | $\delta T$<br>(°C) |
| 32            | 0.13                                          | 1.24               | 0.26                                          | 1.11               | 0.37                                          | 0.51               |
| 39            | 91.56                                         | 0.02               | 91.75                                         | 0.01               | 86.96                                         | 0.01               |
| 45            | 10.21                                         | 0.01               | 7.69                                          | 0.02               | 8.67                                          | 0.02               |
| 55            | 1.83                                          | 1.39               | 1.84                                          | 7.66               | 1.87                                          | 3.76               |
